# Supplementary material for: Non-standard base pairing and stacked structures in methyl xanthine clusters
Source: Royal Society of Chemistry journal article supplement (doi:10.1039/b719874d), 2008-01-01
Supplement: b719874d.pdf [file b719874d.pdf]

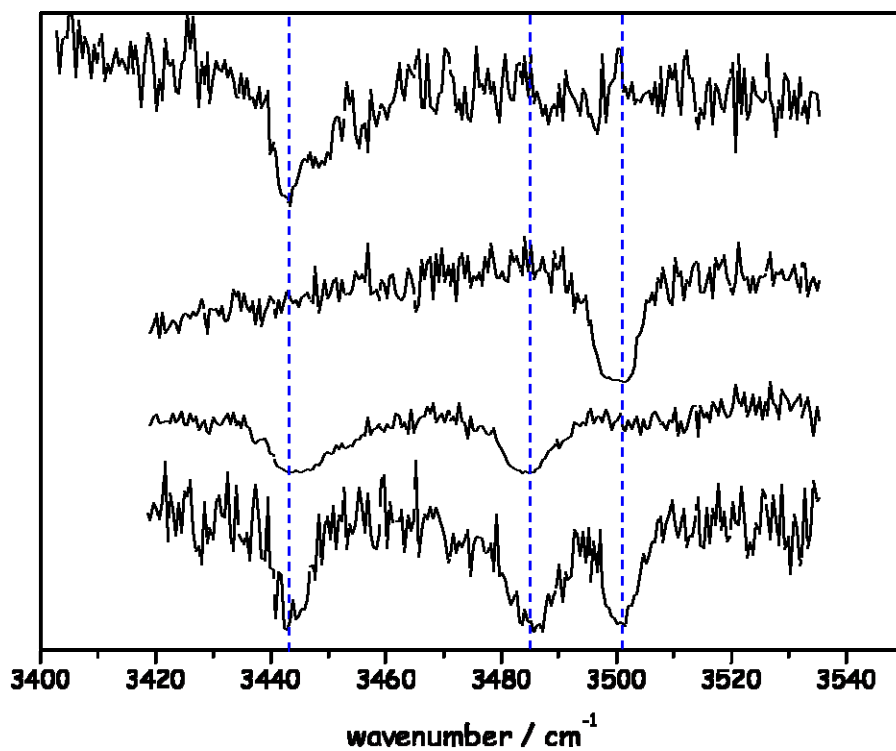

**Figure S1:** IR-UV double resonance spectra theobromine (top trace), theophylline (second trace), 7-methylxanthine (third trace), and xanthine (bottom trace).
